# Supplementary material for: Modeling the catarrhal stage of Bordetella pertussis upper respiratory tract infections in mice
Source: PubMed Central journal article supplement (PMC9092653; doi:10.1242/dmm.049266), 2022-05-03
Supplement: dmm-15-049266-s1.pdf [file dmm-15-049266-s1.pdf]

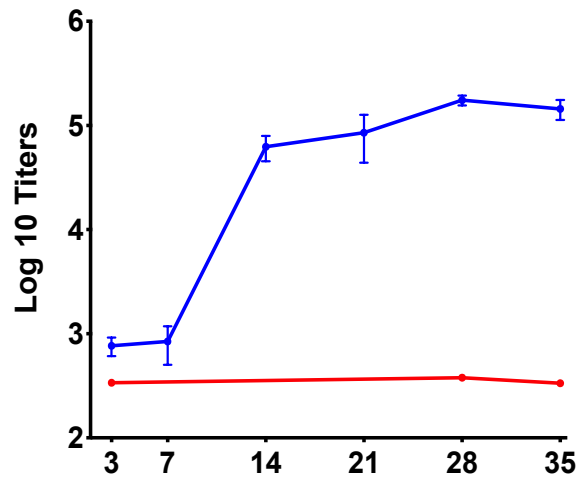

**Fig. S1.** Average serum anti-*B. pertussis* IgG titers from groups of C3H/HeJ mice inoculated intranasally with a high dose ( $10^7$  CFU/5 $\mu$ L PBS) of *B. pertussis* (blue line) or left uninfected (red line). (n=4 per group)

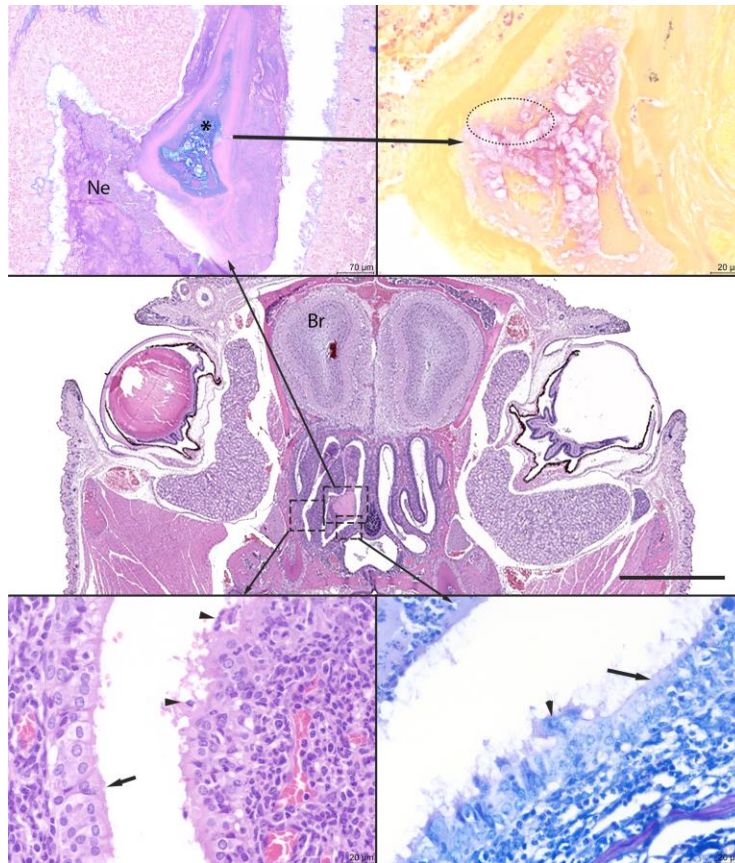

**Fig. S2. Histopathology of *B. pertussis* day 7 post infection**

**Center panel:** Representative images from the *B. pertussis* challenged mice obtained from stained whole-slide scanned images of coronal section of the nose at the level of the eyes and olfactory bulb of the brain (Br). HE stain. Scale bar = 2 mm. Dashed rectangles and arrows illustrate higher magnification of affected areas. **Top left:** image illustrates a mucopurulent exudate within the nasal meatus (asterisk, \*). The exudate has a mixture of neutrophils (Ne) arranged about proteinaceous (pink/purple) and mucous material (blue) in the center. Periodic Acid Schiff-Alcian Blue stain. Scale bar = 70  $\mu$ m. **Top right:** image, the dashed ellipse illustrates a cluster or colony of gram-negative bacteria within the mucous-rich exudate. **Bottom left:** the long arrow points to ciliated epithelia, and the arrowhead points to sloughed cells lining the nasal turbinate. HE stain. Scale bar = 20  $\mu$ m. **Bottom right:** the long arrow points to epithelia with loss of cilia, and the arrow head points to sloughed ciliated cells lining the nasal turbinate. Giemsa stain. Scale bar = 20  $\mu$ m.

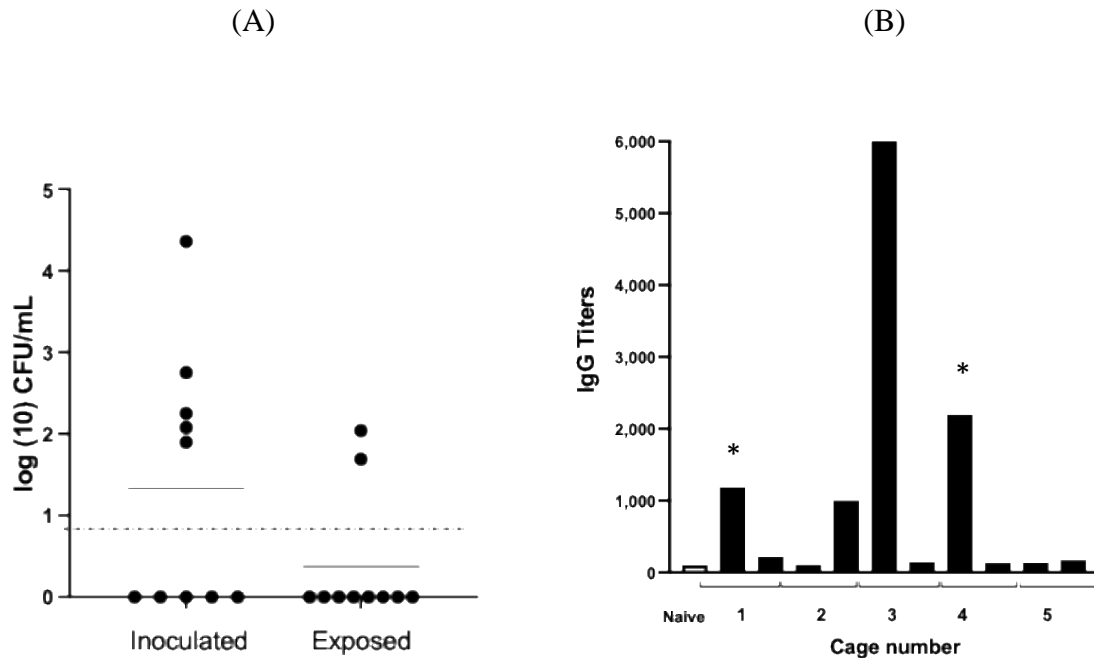

**Fig. S3. Transmission of *B. pertussis* among adult mice.** **A.)** Filled circles on graph represent the number of *B. pertussis* CFUs recovered from the nasal cavities of individual mice that had been inoculated with *B. pertussis* (“Inoculated”) or co-housed with inoculated mice (“Exposed”) for 28 days (2 inoculated + 2 naïve; n = 5 cages). The horizontal bar indicates the mean, the dashed line indicates the level of detection. **B.)** Seropositivity of anti *B. pertussis* IgG in exposed mice. The graph shows the relative titers of anti- *B. pertussis* IgG antibodies detected in individual sera of 10 exposed mice co-housed in 5 cages (2 mice per cage) for 28 days with mice inoculated via catarrhal model.

**Table S1. Primers (Integrated DNA Technologies, United States), used in study to evaluate catarrhal stage expression of targeted genes.**

|                                                                                                                                                                                                                                       |
|---------------------------------------------------------------------------------------------------------------------------------------------------------------------------------------------------------------------------------------|
| 1. Glyceraldehyde-3-phosphate dehydrogenase<br>GAPDH Forward: 5'-TCACCATGGAGAAGGC-3'<br>GAPDH Reverse: 5'-GCTAAGTTGGTGGTGCA-3'                                                                                                        |
| 2. Mucin<br>Muc1 F: 5'-GATCTCTAGCATCAAGTTC-3'<br>Muc1 R: 5'-CTCATTCACITTTGACTTCT-3<br>Muc4 F: 5'-GATACTCCAAGTTCATAAC-3'<br>Muc4 R: 5'-CAGGAGTTGTTCTTTG-3'<br>Muc5a F: 5'-CTATCAAGGCTGCTTATTT-3'<br>Muc5a R: 5'-GCTGGTATACTTGGTTATC-3' |
| 3. Complement C3<br>C3 F: 5'-AGGAATTCAACTCAGATAAG-3'<br>C3 R: 5'-CAGTGAAGATCCGATATAAG-3'                                                                                                                                              |
| 4. Chitinase 3-like-1<br>Chil 1 F: 5'-CTGATCAAGGAACTGAATG-3'<br>Chil 1 R: 5'-CGTAGGTCATGAGATTGATA-3'                                                                                                                                  |

**Table S2. Histopathology scores of mice inoculated either with, [1] a high dose ( $3-4 \times 10^7$  CFU/5 $\mu$ L PBS) of *B. pertussis*, [2] three treatments of 10 $\mu$ L gentamicin (45 $\mu$ g) 8 hours apart and inoculated after 12 hours with  $3-4 \times 10^7$  CFU/5 $\mu$ L PBS, [3] 5  $\mu$ L PBS only, or [4] Antibiotic (gentamicin 45 $\mu$ /10uL) only. Sev –severity; Dist - distribution**

| Date of Necropsy                                                                                                                                                                                                                                    | Strain                        | Group | DPI | Mouse ID | Histo # | Nose Levels 1-4 |      |   | Nose Levels 1-4  |      |     | Nose Levels 1-4 |       | Brain - olfactory bulb |      |
|-----------------------------------------------------------------------------------------------------------------------------------------------------------------------------------------------------------------------------------------------------|-------------------------------|-------|-----|----------|---------|-----------------|------|---|------------------|------|-----|-----------------|-------|------------------------|------|
|                                                                                                                                                                                                                                                     |                               |       |     |          |         | Inflammation    |      |   | Hyaline globules |      |     | Biofilm         | Mucus | Inflammation           |      |
|                                                                                                                                                                                                                                                     |                               |       |     |          |         | Sev             | Dist |   | Sev              | Dist |     |                 |       | Sev                    | Dist |
| 12/24/2018                                                                                                                                                                                                                                          | 1 (PBS + B. pertussis)        | 7     | 1   | R19-630  | 3       | 3               |      | 0 | 0                |      | yes | yes             | 2     | 2                      |      |
|                                                                                                                                                                                                                                                     |                               |       | 2   | R19-631  | 3       | 3               |      | 0 | 0                |      | yes | yes             | 2     | 1                      |      |
|                                                                                                                                                                                                                                                     |                               |       | 3   | R19-632  | 3       | 3               |      | 0 | 0                |      | yes | yes             | 2     | 1                      |      |
|                                                                                                                                                                                                                                                     |                               |       | 4   | R19-633  | 3       | 3               |      | 0 | 0                |      | yes | yes             | 2     | 2                      |      |
|                                                                                                                                                                                                                                                     | 2 (Gentamicin + B. pertussis) | 7     | 5   | R19-634  | 3       | 3               |      | 0 | 0                |      | yes | yes             | 2     | 1                      |      |
|                                                                                                                                                                                                                                                     |                               |       | 6   | R19-635  | 3       | 3               |      | 0 | 0                |      | yes | yes             | 1     | 1                      |      |
|                                                                                                                                                                                                                                                     |                               |       | 7   | R19-636  | 3       | 3               |      | 0 | 0                |      | yes | yes             | 1     | 1                      |      |
|                                                                                                                                                                                                                                                     |                               |       | 8   | R19-637  | 3       | 3               |      | 0 | 0                |      | yes | yes             | 1     | 1                      |      |
|                                                                                                                                                                                                                                                     | 3 (PBS)                       | 7     | 9   | R19-638  | 0       | 0               |      | 0 | 0                |      | yes | no              | 0     | 0                      |      |
|                                                                                                                                                                                                                                                     |                               |       | 10  | R19-639  | 0       | 0               |      | 0 | 0                |      | yes | no              | 0     | 0                      |      |
|                                                                                                                                                                                                                                                     | 4 (Gentamicin)                | 7     | 11  | R19-640  | 0       | 0               |      | 0 | 0                |      | yes | no              | 0     | 0                      |      |
|                                                                                                                                                                                                                                                     |                               |       | 12  | R19-641  | 0       | 0               |      | 0 | 0                |      | yes | no              | 0     | 0                      |      |
| DPI = DAYS POST INFECTION                                                                                                                                                                                                                           |                               |       |     |          |         |                 |      |   |                  |      |     |                 |       |                        |      |
| HISTOPATHOLOGIC SCORES WERE ASSIGNED AS GRADES 0 (NO SIGNIFICANT HISTOPATHOLOGICAL ALTERATIONS); 1 (MINIMAL); 2 (MILD); 3 (MODERATE); SPECIFIED OR 4 (SEVERE) BASED ON AN INCREASING EXTENT AND/OR COMPLEXITY OF CHANGE, UNLESS OTHERWISE SPECIFIED |                               |       |     |          |         |                 |      |   |                  |      |     |                 |       |                        |      |
| DISTRIBUTION SCORING KEY: 1 - FOCAL; 2 - MULTIFOCAL; 3 - DIFFUSE                                                                                                                                                                                    |                               |       |     |          |         |                 |      |   |                  |      |     |                 |       |                        |      |
| SCORED BY/DATE: Uriel Blas-Machado DVM, PhD, DACVP 27Feb2019                                                                                                                                                                                        |                               |       |     |          |         |                 |      |   |                  |      |     |                 |       |                        |      |

**Table S3. Differential gene expression in nasal cavity tissue from mice during infection with *Bordetella bronchiseptica*.** Table depicts 11 genes exhibiting changes over time in expression levels (log<sub>2</sub> fold change) over time in the nasal cavities of mice inoculated with *B. bronchiseptica*. The analysis reveals induction of a strong innate immune response starting as early as 3-days postinfection lasting throughout the time course to day 21. mRNA transcripts of *B. pertussis Chil-1*, *Cd177*, *C3* and *muc* gene homolog were analyzed in this study.

| Gene                                     | Symbol         | Function                                 | log <sub>2</sub> (fold change) at day p.i. |      |      |      |
|------------------------------------------|----------------|------------------------------------------|--------------------------------------------|------|------|------|
|                                          |                |                                          | 3                                          | 7    | 14   | 21   |
| Chitinase-like 1                         | <i>Chil1</i>   | Th2 inflammatory response, antimicrobial | 2.67                                       | 2.46 | 2.86 | 2.73 |
| CD177                                    | <i>Cd177</i>   | Neutrophil degranulation                 | 2.48                                       | 2.65 | 3.10 | 2.61 |
| Complement Component C3                  | <i>C3</i>      | Activation of the Complement system      | 1.67                                       | 1.30 | 2.00 | 1.93 |
| Ceruloplasmin                            | <i>Cp</i>      | Iron homeostasis                         | 1.38                                       | 1.25 | 1.59 | 1.30 |
| Regenerating islet-derived 3 gamma       | <i>Reg3g</i>   | Secretion of bactericidal C-type lectin  | 1.10                                       | 1.25 | 1.66 | 1.46 |
| TNF $\alpha$ induced protein 2           | <i>Tnfaip2</i> | Inflammation mediator                    | 1.32                                       | 1.36 | 2.27 | 1.91 |
| Interferon induced transmembrane protein | <i>Ifitm1</i>  | IFN-induced antiviral protein            | 1.27                                       | 1.40 | 1.38 | 1.56 |
| Mucin 1                                  | <i>Muc1</i>    | O-linked glycosylation of mucins         | 1.31                                       | 1.11 | 1.33 | 1.22 |
| Mucin 4                                  | <i>Muc4</i>    | O-linked glycosylation of mucins         | 1.33                                       | 1.27 | 2.02 | 1.64 |
| Mucin 5                                  | <i>Muc5ac</i>  | O-linked glycosylation of mucins         | 1.68                                       | 2.43 | 3.53 | 3.18 |
| Polymeric immunoglobulin receptor        | <i>Pigr</i>    | Immunoglobulin transcytosis              | 1.12                                       | 1.13 | 2.33 | 2.27 |
